# Supplementary material
Source: MDPI journal article supplement (https://www.mdpi.com/2073-4441/15/4/633)
Supplement: s1 [file s1]

## SUPPLEMENTARY INFORMATION

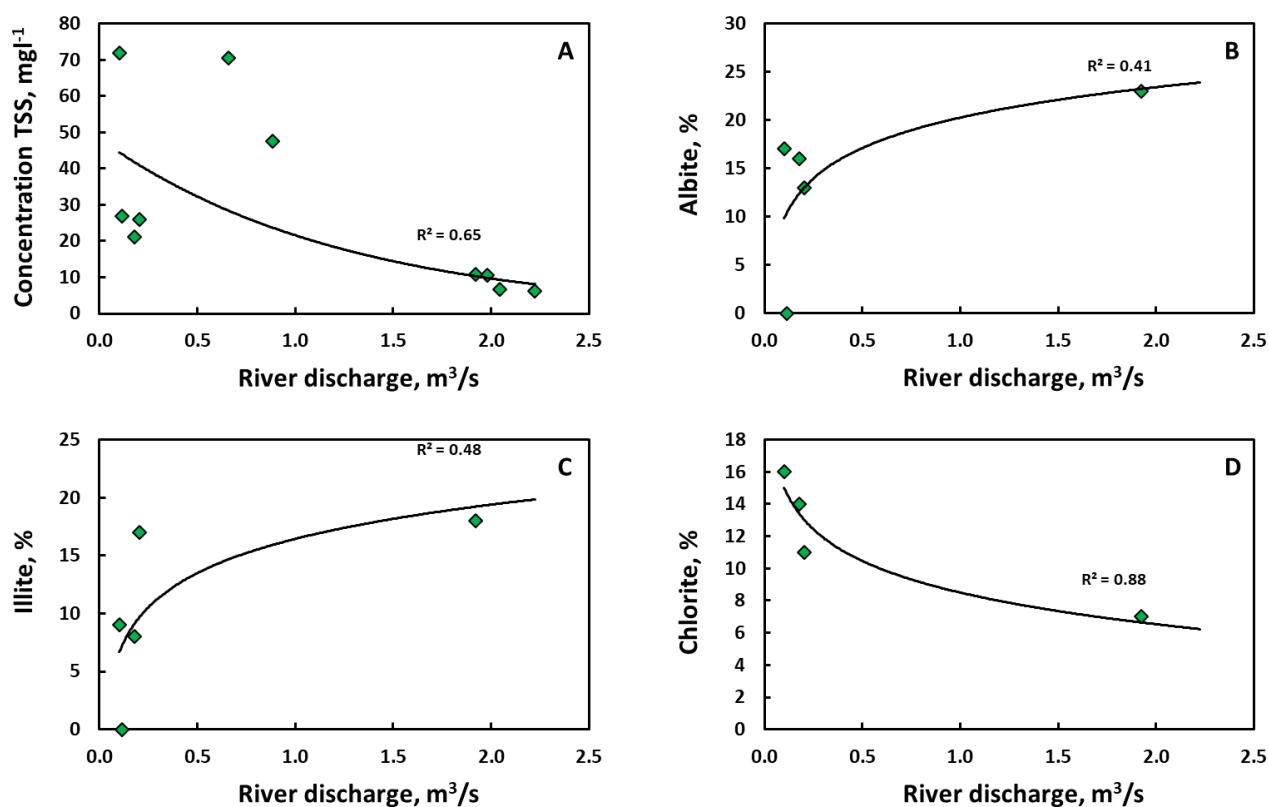

**Figure S1.** Mass percentage of different minerals in the RSM of two small tributaries of the Ob River as a function of river discharge. A, Total suspended solid; B, albite; C, illite; and D, chlorite. Significant ( $p < 0.05$ ) trends are visualized via empirical logarithmic or power regression.

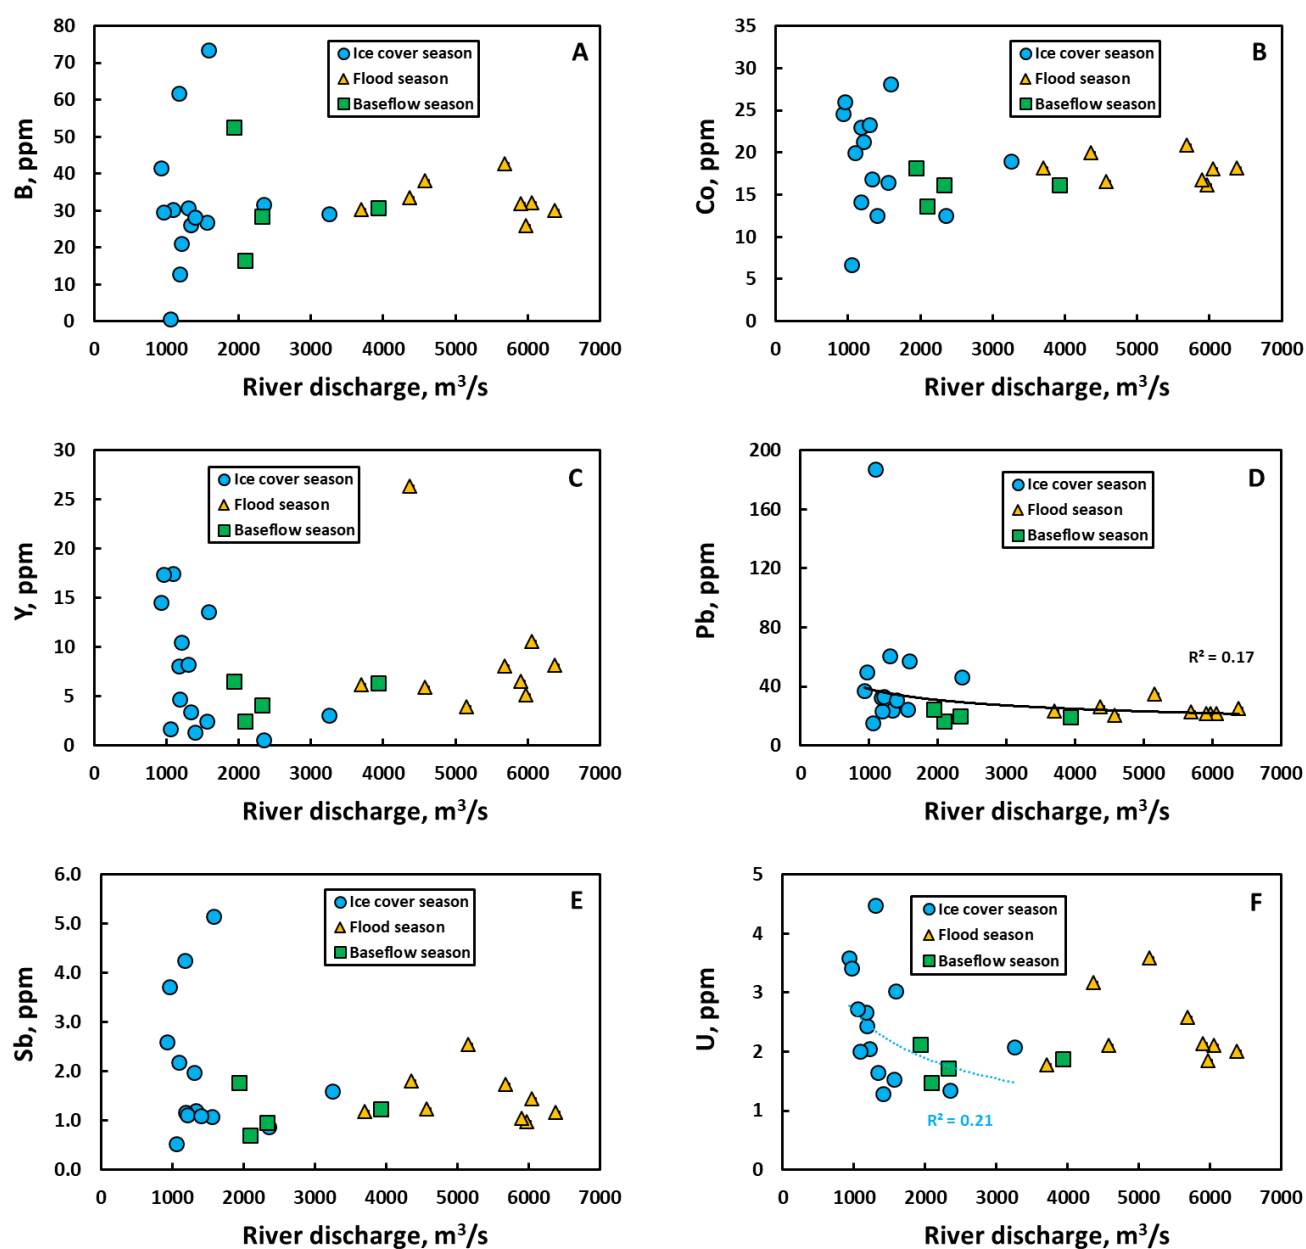

**Figure S2.** Elements, showing lack of discharge - concentration dependence in the RSM of the Ob River during winter (blue circles), spring flood (yellow triangles), and summer baseflow (green squares). Significant ( $p < 0.05$ ) trends are visualized via empirical logarithmic or power regression.

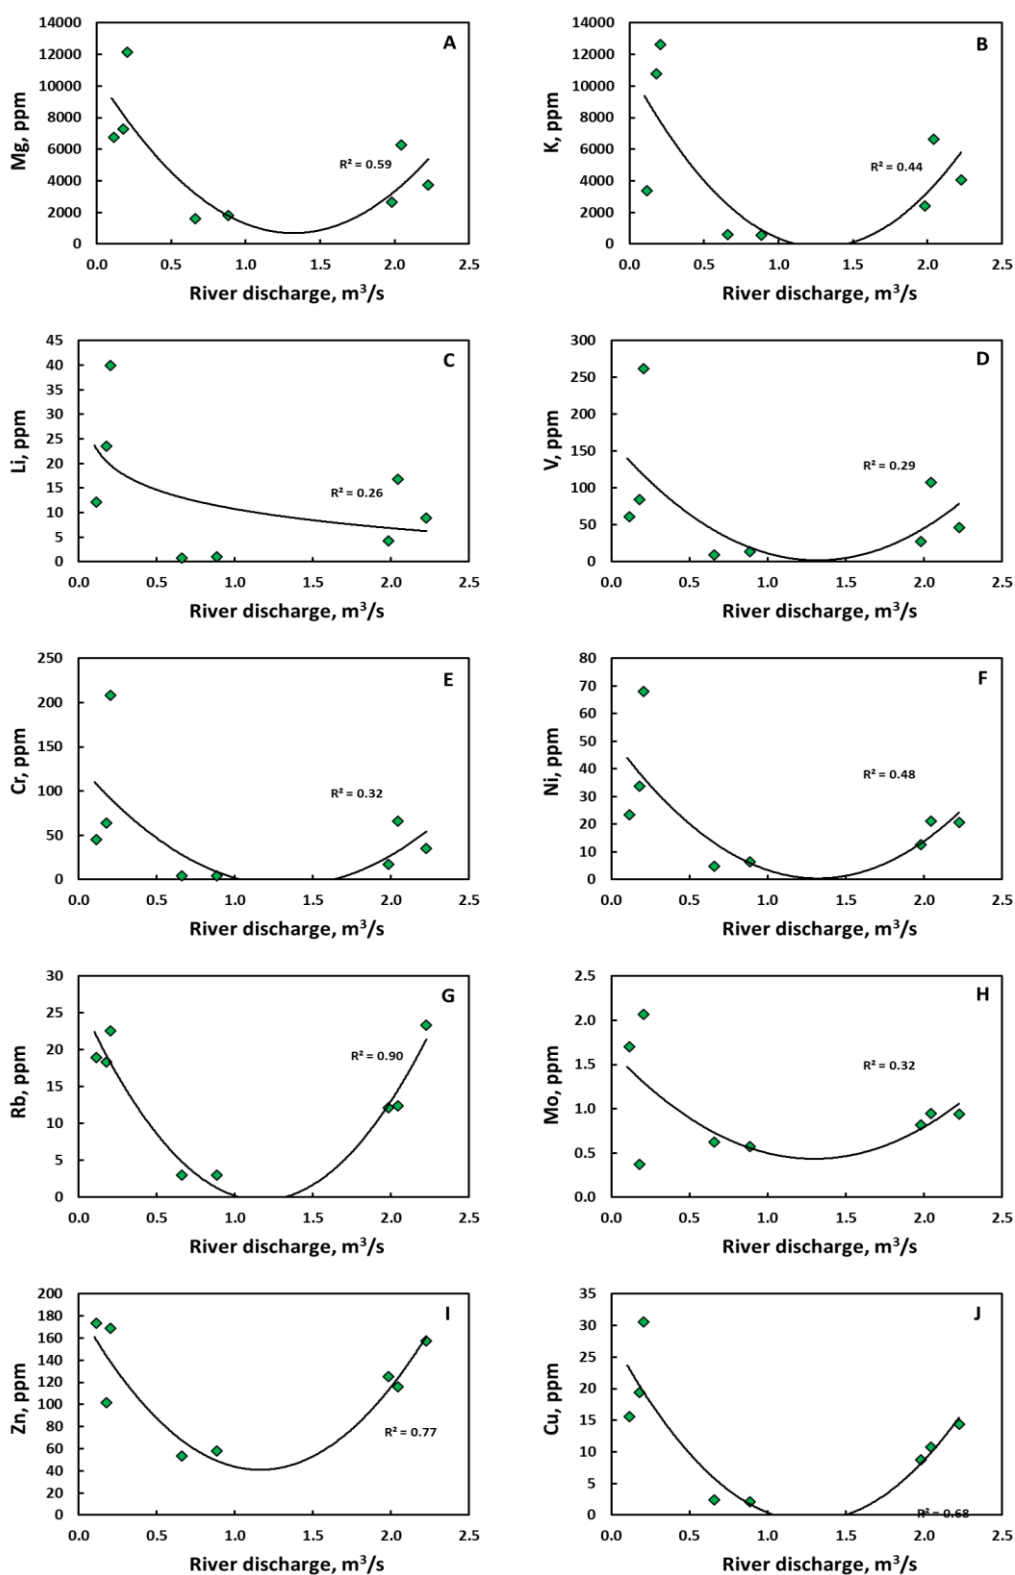

**Figure S3.** Major and trace element concentration in the RSM of the small tributaries of the Ob River as a function of river discharge. Significant ( $p < 0.05$ ) trends are visualized via empirical logarithmic or power regression.

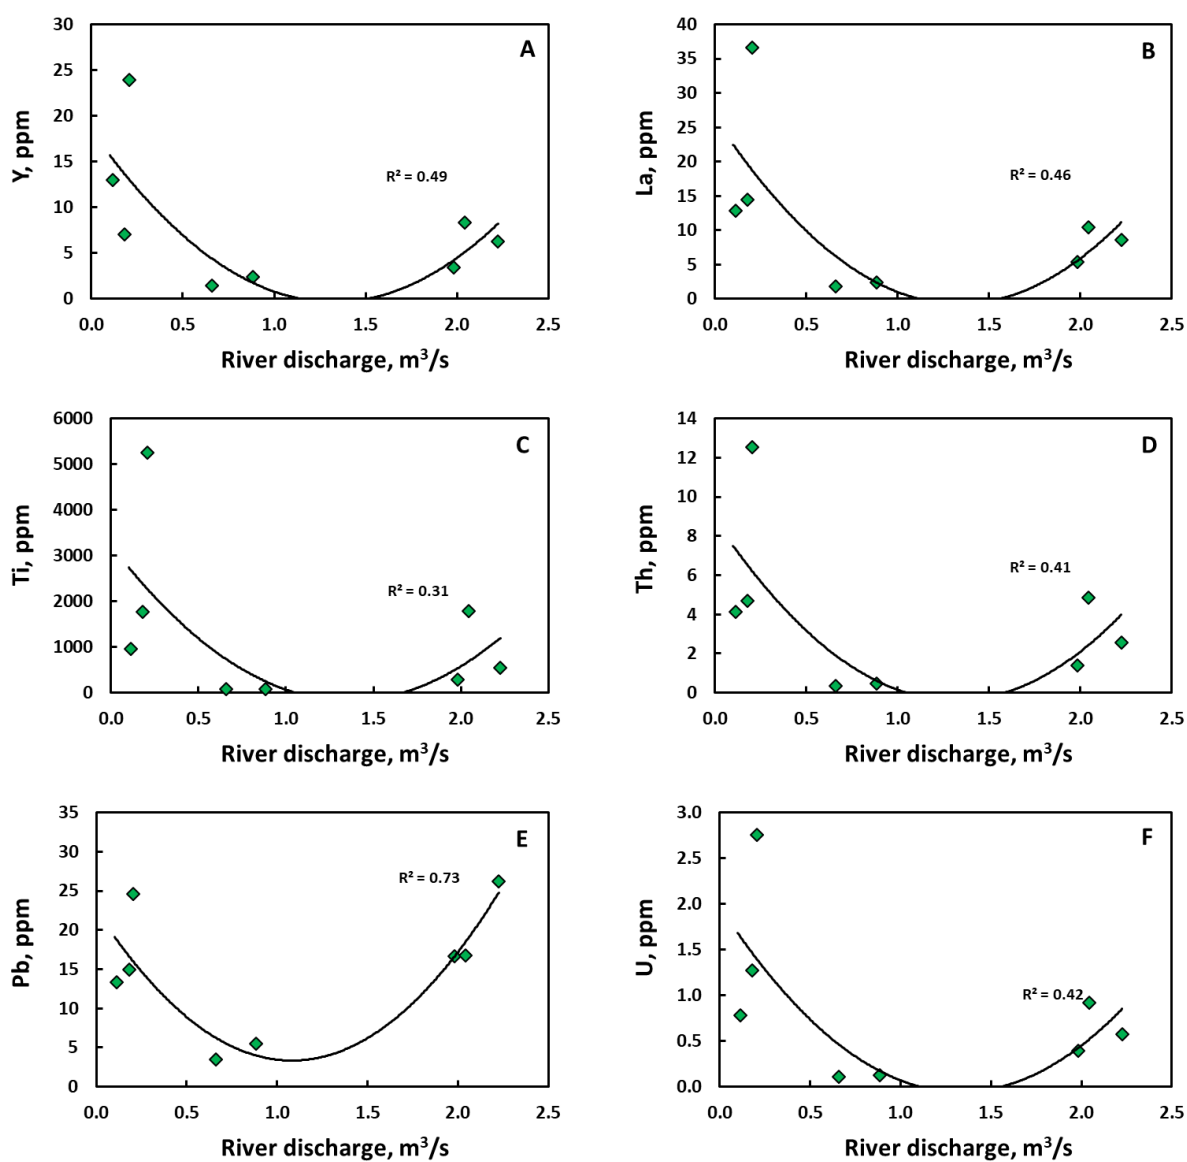

**Figure S4.** Major and trace element concentration in the RSM of the small tributaries of the Ob River as a function of river discharge. Significant ( $p < 0.05$ ) trends are visualized via empirical logarithmic or power regression.

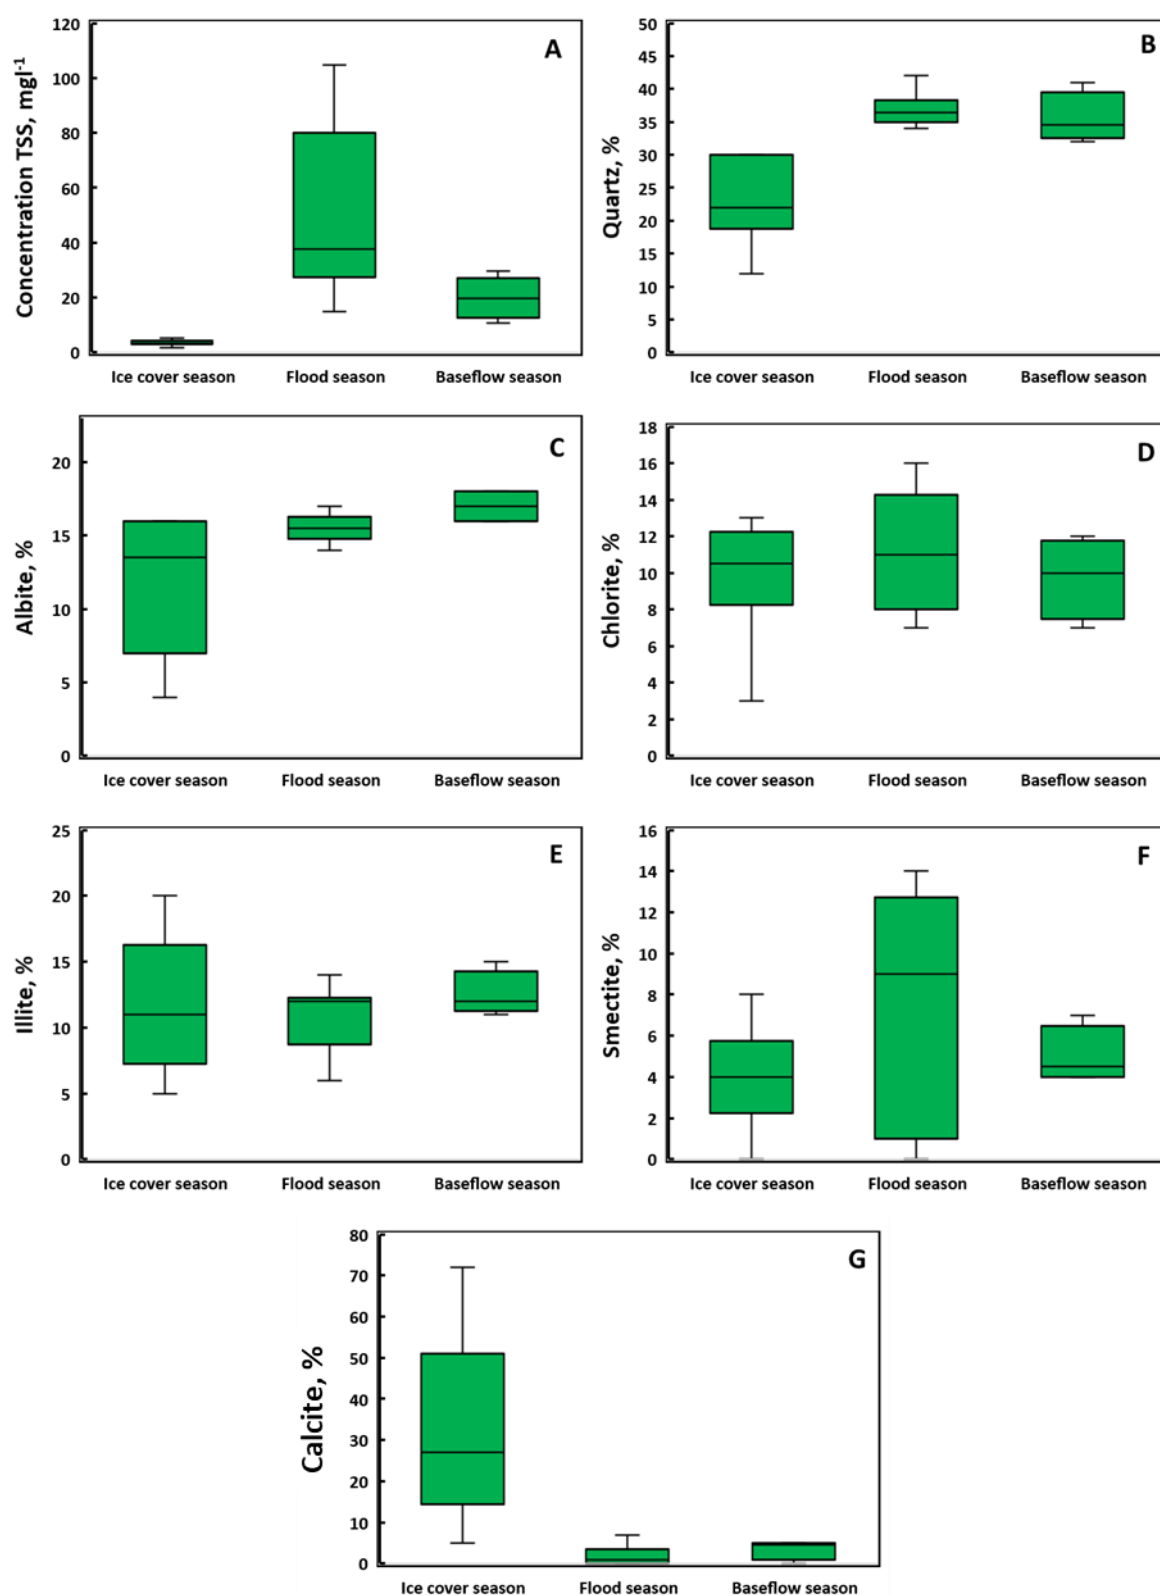

**Figure S5.** Seasonal pattern of total suspended solid (A) and mass percentage of different minerals (quartz, B; albite, C; chlorite, D; illite, E; smectite, F; calcite, G) in the RSM of the Ob River.

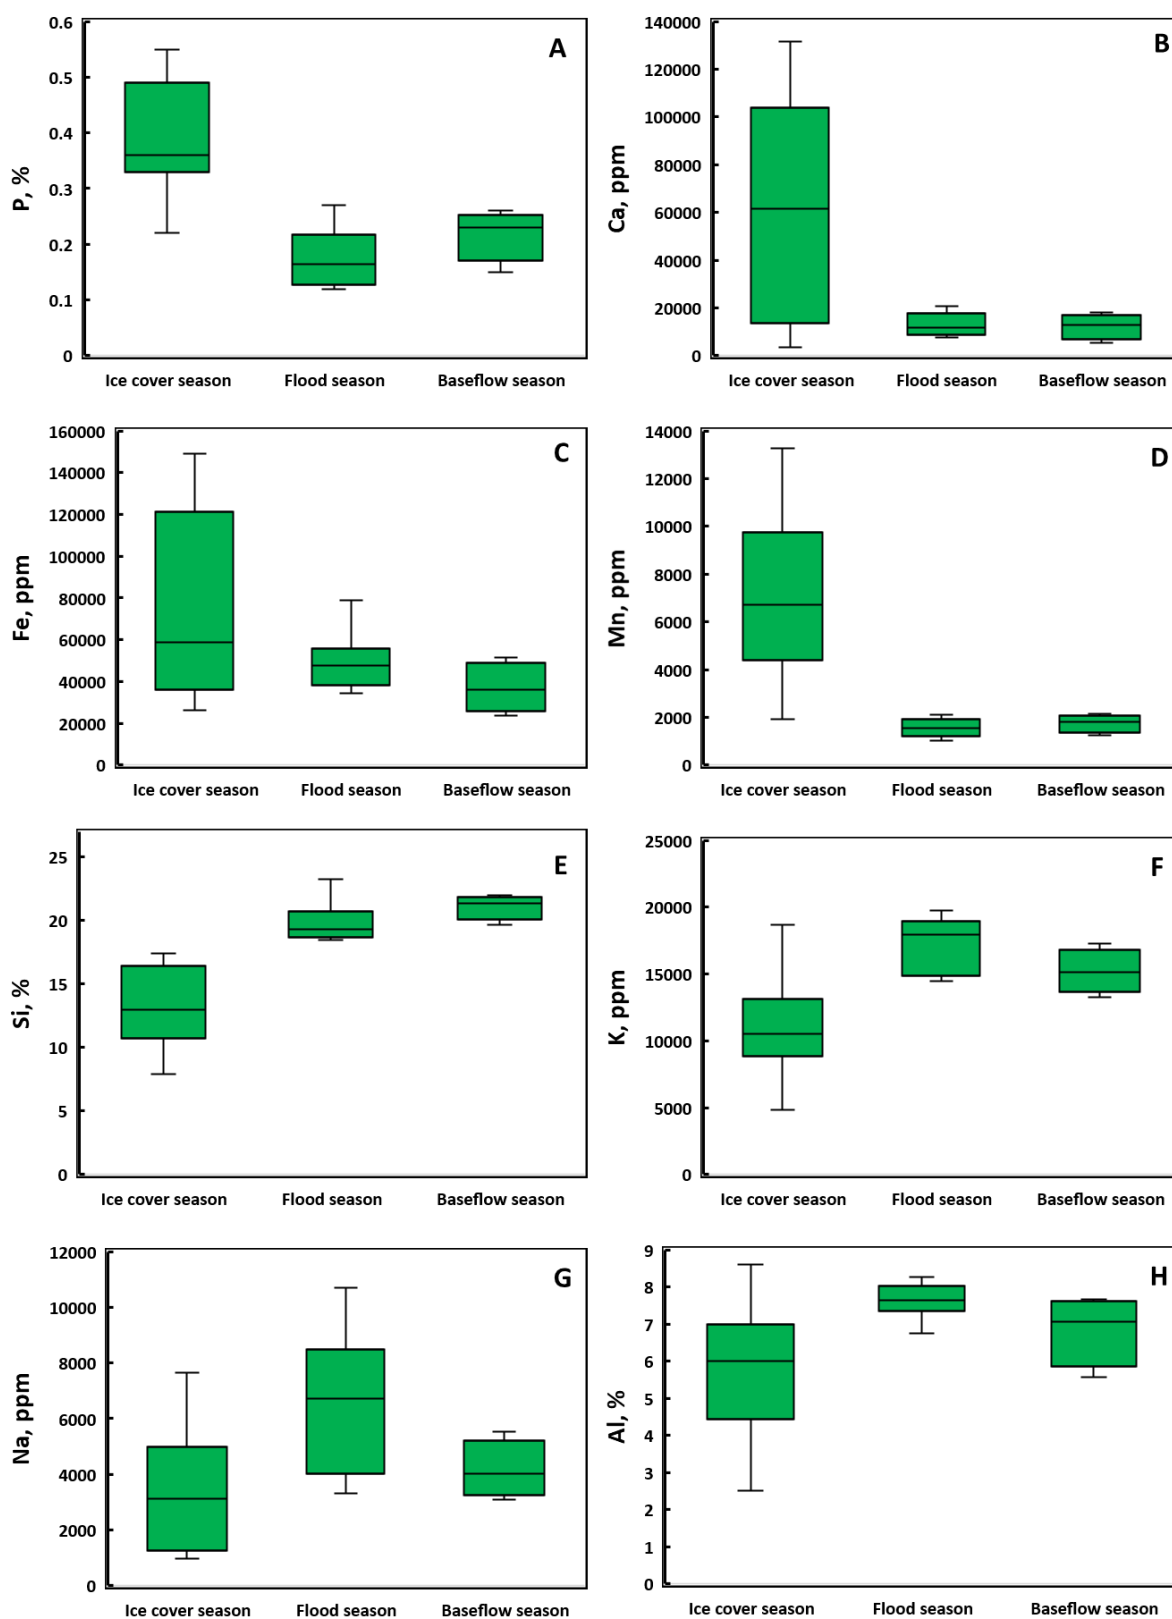

**Figure S6.** Seasonal pattern of element concentration in the RSM of the Ob River.

**Table S1.** Mineralogical composition of sediments and RSM concentration in the Ob River and tributaries.**Mineral composition of the Ob River**

| Date       | Discharge<br>m <sup>3</sup> s <sup>-1</sup> | TSS<br>mg L <sup>-1</sup> | Quartz | Albite | Potassium<br>feldspars | Amphi-<br>bole | Pyro-<br>xene | Musco-<br>vite | Calcite | Smectite | Illite | Kaoli-<br>nite | Chlorite | Vermiculite |
|------------|---------------------------------------------|---------------------------|--------|--------|------------------------|----------------|---------------|----------------|---------|----------|--------|----------------|----------|-------------|
| 04.11.2016 | 1560                                        | 3.30                      | 30     | 16     | 8                      |                | 4             |                | 5       | 4        | 20     | 3              | 10       |             |
| 04.12.2016 | 1340                                        | 3.33                      | n.d.   | n.d.   | n.d.                   | n.d.           | n.d.          | n.d.           | n.d.    | n.d.     | n.d.   | n.d.           | n.d.     | n.d.        |
| 05.01.2017 | 1180                                        | 4.60                      | n.d.   | n.d.   | n.d.                   | n.d.           | n.d.          | n.d.           | n.d.    | n.d.     | n.d.   | n.d.           | n.d.     | n.d.        |
| 05.02.2017 | 1170                                        | 1.88                      | n.d.   | n.d.   | n.d.                   | n.d.           | n.d.          | n.d.           | n.d.    | n.d.     | n.d.   | n.d.           | n.d.     | n.d.        |
| 10.03.2017 | 1210                                        | 4.21                      | n.d.   | n.d.   | n.d.                   | n.d.           | n.d.          | n.d.           | n.d.    | n.d.     | n.d.   | n.d.           | n.d.     | n.d.        |
| 16.03.2017 | 1300                                        | 2.79                      | n.d.   | n.d.   | n.d.                   | n.d.           | n.d.          | n.d.           | n.d.    | n.d.     | n.d.   | n.d.           | n.d.     | n.d.        |
| 05.04.2017 | 3250                                        | 18.3                      | 30     | 16     | 8                      | 5              | 5             |                |         | 5        | 15     | 5              | 11       |             |
| 01.03.2018 | 1050                                        | 3.02                      | 12     | 4      | 1                      |                |               |                | 72      | trace    | 5      | 2              | 3        |             |
| 01.04.2018 | 2350                                        | 2.83                      | n.d.   | n.d.   | n.d.                   | n.d.           | n.d.          | n.d.           | n.d.    | n.d.     | n.d.   | n.d.           | n.d.     | n.d.        |
| 29.11.2018 | 1590                                        | 3.40                      | n.d.   | n.d.   | n.d.                   | n.d.           | n.d.          | n.d.           | n.d.    | n.d.     | n.d.   | n.d.           | n.d.     | n.d.        |
| 28.12.2018 | 1400                                        | 3.50                      | n.d.   | n.d.   | n.d.                   | n.d.           | n.d.          | n.d.           | n.d.    | n.d.     | n.d.   | n.d.           | n.d.     | n.d.        |
| 17.01.2019 | 1090                                        | 3.60                      | 22     | 8      | 5                      | 3              | 2             |                | 27      | 8        | 8      | 2              | 13       |             |
| 08.02.2019 | 930                                         | 5.10                      | 22     | 14     | 5                      | trace          | 3             |                | 30      | 4        | 9      | 3              | 10       |             |
| 03.03.2019 | 960                                         | 3.44                      | 21     | 13     | 7                      | 2              | 3             |                | 24      | 3        | 13     | 2              | 12       |             |
| 05.05.2017 | 5970                                        | 29.3                      | 38     | 16     | 6                      | 4              |               | 3              | 1       | 8        | 12     | 3              | 8        |             |

|                   |      |      |    |    |   |   |   |   |       |       |    |   |    |   |
|-------------------|------|------|----|----|---|---|---|---|-------|-------|----|---|----|---|
| <b>28.04.2018</b> | 4570 | 105  | 42 | 15 | 7 | 3 | 3 |   | trace |       | 12 | 5 | 10 | 3 |
| <b>05.05.2018</b> | 5150 | 89.0 | 37 | 17 | 6 | 3 | 3 |   |       | 4     | 10 | 3 | 16 |   |
| <b>12.05.2018</b> | 5680 | 62.4 | 37 | 15 | 7 | 3 | 3 | 3 | trace | trace | 6  | 2 | 14 | 9 |
| <b>23.05.2018</b> | 6050 | 77.0 | 35 | 16 | 5 | 3 | 3 |   | 2     | 12    | 8  | 2 | 14 |   |
| <b>10.06.2018</b> | 6380 | 32.2 | 36 | 15 | 7 |   | 2 | 3 | 1     | 13    | 12 | 2 | 9  |   |
| <b>25.06.2018</b> | 5900 | 14.9 | 39 | 16 | 6 | 4 | 3 |   |       | 10    | 14 | 1 | 7  |   |
| <b>27.04.2019</b> | 3700 | 27.5 | 36 | 19 | 8 | 5 |   |   | 7     | trace | 13 | 4 | 8  |   |
| <b>17.05.2019</b> | 4360 | 27.2 | 34 | 14 | 5 | 3 | 2 | 4 | trace | 14    | 9  | 3 | 12 |   |
| <b>01.06.2019</b> | 4480 | 43.0 | 35 | 14 | 8 | 4 |   | 2 | 4     |       | 12 |   | 15 | 6 |
| <b>26.07.2018</b> | 3930 | 29.5 | 32 | 18 | 6 | 3 | 1 | 3 | 5     | 7     | 11 | 2 | 11 |   |
| <b>06.09.2018</b> | 2330 | 20.1 | 35 | 18 | 8 |   | 4 | 4 | 5     | 4     | 12 | 3 | 7  |   |
| <b>28.09.2018</b> | 2090 | 19.0 | 41 | 16 | 8 | 3 | 2 |   | trace | 4     | 12 | 2 | 12 |   |
| <b>19.10.2018</b> | 1940 | 10.7 | 34 | 16 | 7 | 4 | 3 |   | 4     | 5     | 15 | 3 | 9  |   |



# Mineral composition of tributaries

|         | Date       | Dis-<br>charg<br>e m <sup>3</sup> s <sup>-1</sup> | TSS<br>mg L <sup>-1</sup> | Quartz | Al-<br>bite | Potassium<br>feldspars | Amphi-<br>bole | Pyro-<br>xene | Musco-<br>vite | Cal-<br>cite | Smec-<br>tite | Illit | Kaolinite | Chlo-<br>rite | Vermi-<br>culite |
|---------|------------|---------------------------------------------------|---------------------------|--------|-------------|------------------------|----------------|---------------|----------------|--------------|---------------|-------|-----------|---------------|------------------|
| Rybnaya | 10.05.2018 | 1.98                                              | 10.6                      | n.d.   | n.d.        | n.d.                   | n.d.           | n.d.          | n.d.           | n.d.         | n.d.          | n.d.  | n.d.      | n.d.          | n.d.             |
| Rybnaya | 05.07.2018 | 0.659                                             | 70.4                      | n.d.   | n.d.        | n.d.                   | n.d.           | n.d.          | n.d.           | n.d.         | n.d.          | n.d.  | n.d.      | n.d.          | n.d.             |
| Rybnaya | 20.09.2018 | 0.115                                             | 26.8                      | 90     | trace       | trace                  | trace          |               |                |              | trace         | trace | trace     |               |                  |
| Rybnaya | 21.10.2018 | 0.101                                             | 71.8                      | 36     | 17          | 8                      | 6              | 3             |                |              |               | 9     | 5         | 16            | trace            |
| Andreva | 10.05.2018 | 2.22                                              | 6.29                      | n.d.   | n.d.        | n.d.                   | n.d.           | n.d.          | n.d.           | n.d.         | n.d.          | n.d.  | n.d.      | n.d.          | n.d.             |
| Andreva | 05.07.2018 | 0.885                                             | 47.6                      | n.d.   | n.d.        | n.d.                   | n.d.           | n.d.          | n.d.           | n.d.         | n.d.          | n.d.  | n.d.      | n.d.          | n.d.             |
| Andreva | 20.09.2018 | 0.206                                             | 26.0                      | 35     | 13          | 11                     | 6              |               |                |              | trace         | 17    | 6         | 11            |                  |
| Andreva | 21.10.2018 | 0.180                                             | 21.2                      | 34     | 16          | 7                      | 5              | 3             |                |              |               | 8     | 4         | 14            | 9                |
| Andreva | 17.05.2019 | 2.04                                              | 6.67                      | n.d.   | n.d.        | n.d.                   | n.d.           | n.d.          | n.d.           | n.d.         | n.d.          | n.d.  | n.d.      | n.d.          | n.d.             |
| Andreva | 01.06.2019 | 1.92                                              | 10.8                      | 41     | 23          | 9                      |                | trace         |                |              | trace         | 18    | trace     | 7             |                  |

**Table S2.** Chemical composition of sediments and RSM concentration in the Ob River and tributaries.

**Elemental composition Ob’ river**

| Date    | 04.11.2016 | 04.12.2016 | 05.01.2017 | 05.02.2017 | 10.03.2017 | 16.03.2017 | 05.04.2017 | 01.03.2018 | 01.04.2018 | 29.11.2018 | 28.12.2018 | 17.01.2019 | 08.02.2019 | 03.03.2019 | 05.05.2017 | 28.04.2018 | 05.05.2018 | 12.05.2018 | 23.05.2018 | 10.06.2018 | 25.06.2018 | 27.04.2019 | 17.05.2019 | 26.07.2018 | 06.09.2018 | 28.09.2018 | 19.10.2018 |
|---------|------------|------------|------------|------------|------------|------------|------------|------------|------------|------------|------------|------------|------------|------------|------------|------------|------------|------------|------------|------------|------------|------------|------------|------------|------------|------------|------------|
| Si,%    | 17.4       | n.d.       | 10.7       | n.d.       | n.d.       | n.d.       | 15.4       | n.d.       | n.d.       | n.d.       | n.d.       | 12.4       | 16.4       | 13.0       | 20.2       | 18.8       | 23.3       | 22.2       | 19.4       | 18.9       | 18.5       | 20.2       | 19.2       | 22.0       | 21.3       | 19.7       | 21.5       |
| Al,%    | 6.98       | n.d.       | 4.43       | n.d.       | n.d.       | n.d.       | 8.60       | 2.52       | n.d.       | n.d.       | n.d.       | 5.18       | 6.12       | 6.00       | 7.94       | 7.49       | 8.26       | 8.01       | 7.52       | 8.10       | 7.42       | 7.13       | 7.74       | 7.67       | 7.45       | 5.58       | 6.66       |
| P,%     | 0.330      | n.d.       | 0.550      | n.d.       | n.d.       | n.d.       | 0.220      | 0.340      | n.d.       | n.d.       | n.d.       | 0.360      | 0.450      | 0.490      | 0.160      | 0.270      | 0.130      | 0.120      | 0.120      | 0.170      | 0.150      | 0.270      | 0.170      | 0.150      | 0.230      | 0.260      | 0.230      |
| Li, ppm | 16.1       | 17.8       | 15.8       | 34.5       | 20.0       | 25.7       | 20.3       | 5.90       | 11.1       | 51.0       | 13.2       | 31.8       | 40.6       | 37.6       | 23.5       | 27.5       | 36.4       | 28.4       | 33.2       | 35.6       | 20.1       | 23.2       | 37.9       | 23.5       | 18.6       | 11.4       | 20.4       |
| Be, ppm | 1.36       | 1.52       | 1.14       | 2.31       | 1.47       | 1.92       | 1.75       | 0.435      | 1.13       | 3.65       | 0.342      | 2.01       | 2.53       | 2.35       | 1.75       | 2.01       | 3.90       | 2.57       | 2.38       | 1.98       | 1.89       | 1.83       | 2.47       | 1.99       | 1.78       | 1.43       | 2.30       |
| B, ppm  | 26.7       | 26.0       | 12.8       | 61.7       | 21.0       | 30.7       | 29.2       | 0.624      | 31.6       | 73.5       | 28.1       | 30.4       | 41.5       | 29.5       | 25.8       | 38.1       | 64.0       | 42.6       | 32.0       | 30.1       | 31.9       | 30.2       | 33.5       | 30.8       | 28.4       | 16.5       | 52.6       |
| Na, ppm | 1140       | 1180       | 3460       | 1780       | 2770       | 4620       | 1310       | 2160       | 969        | 4070       | 4060       | 7670       | 7310       | 6060       | 5390       | 8460       | 3640       | 7040       | 10700      | 6710       | 4410       | 3310       | 8490       | 5530       | 3740       | 3080       | 4290       |
| Mg, ppm | 2380       | 3110       | 6510       | 6580       | 7000       | 10610      | 2450       | 3260       | 910        | 10600      | 2860       | 13700      | 12800      | 15100      | 6140       | 8280       | 4270       | 6330       | 11200      | 11400      | 4890       | 4960       | 13000      | 4090       | 2650       | 1280       | 3990       |
| K, ppm  | 9060       | 10400      | 8230       | 11500      | 10600      | 11700      | 10400      | 4850       | 9190       | 18700      | 7400       | 13000      | 18000      | 13400      | 14700      | 16900      | 19500      | 18000      | 18300      | 18300      | 14500      | 15000      | 19700      | 15400      | 14900      | 13300      | 17300      |
| Ca, ppm | 8690       | 15300      | 87900      | 30500      | 47400      | 114000     | 3570       | 132000     | 4400       | 39000      | 75900      | 111000     | 81050      | 101000     | 8880       | 12800      | 7700       | 10100      | 17800      | 11900      | 8560       | 17600      | 20600      | 14100      | 11300      | 5320       | 18100      |
| Ti, ppm | 1060       | 1230       | 903        | 3920       | 976        | 1660       | 1370       | 449.0      | 980        | 4300       | 814        | 2260       | 3170       | 2730       | 1780       | 2600       | 4720       | 3510       | 3010       | 2180       | 1890       | 2020       | 3120       | 2520       | 1870       | 1320       | 3210       |
| V, ppm  | 120        | 113        | 99.2       | 422        | 116        | 175        | 92.4       | 41.5       | 62.2       | 388        | 59.6       | 184        | 271        | 256        | 106        | 130        | 277        | 179        | 153        | 125        | 112        | 129        | 183        | 133        | 110        | 79.9       | 185        |
| Cr, ppm | 59.2       | 75.3       | 64.8       | 260        | 81.1       | 130        | 64.5       | 25.9       | 40.0       | 465        | 42.1       | 146        | 207        | 207        | 82.3       | 110        | 208        | 127        | 134        | 104        | 89.3       | 92.8       | 151        | 104        | 80.2       | 53.1       | 134        |
| Mn, ppm | 9850       | 5690       | 7060       | 9710       | 13300      | 9660       | 1990       | 2140       | 1940       | 9390       | 6350       | 5150       | 5380       | 13000      | 1490       | 1030       | 1660       | 1210       | 1230       | 1750       | 1560       | 3390       | 2100       | 1270       | 1680       | 1910       | 2150       |
| Fe, ppm | 43500      | 37100      | 53800      | 149000     | 64100      | 105000     | 32500      | 26200      | 27800      | 126000     | 43100      | 84300      | 120000     | 127000     | 34400      | 45400      | 78700      | 52800      | 50600      | 41400      | 35500      | 47500      | 58400      | 40100      | 32200      | 23600      | 51700      |
| Co, ppm | 16.5       | 16.8       | 14.2       | 23.0       | 21.3       | 23.3       | 19.0       | 6.72       | 12.5       | 28.1       | 12.6       | 20.0       | 24.6       | 26.0       | 16.2       | 16.6       | 29.9       | 20.9       | 18.1       | 18.2       | 16.7       | 18.1       | 20.0       | 16.2       | 16.1       | 13.7       | 18.1       |
| Ni, ppm | 47.1       | 50.6       | 36.8       | 63.1       | 48.7       | 56.0       | 58.2       | 18.3       | 39.7       | 138        | 32.9       | 64.3       | 85.5       | 78.3       | 50.4       | 49.8       | 102        | 67.2       | 56.3       | 55.7       | 52.7       | 54.4       | 58.7       | 54.7       | 50.8       | 41.1       | 61.8       |
| Cu, ppm | 34.5       | 38.4       | 49.2       | 84.0       | 57.6       | 76.2       | 57.8       | 20.2       | 33.5       | 76.4       | 27.5       | 53.5       | 62.9       | 75.4       | 31.8       | 29.0       | 58.6       | 37.1       | 32.3       | 35.9       | 33.5       | 38.5       | 39.7       | 32.8       | 35.3       | 33.0       | 43.3       |
| Zn, ppm | 152        | 122        | 122        | 160        | 186        | 214        | 204        | 156        | 120        | 278        | 466        | 241        | 406        | 306        | 74.7       | 69.7       | 105        | 78.1       | 88.4       | 88.8       | 73.4       | 105        | 114        | 60.1       | 66.4       | 69.2       | 81.2       |
| Ga, ppm | 11.3       | 12.4       | 9.48       | 24.7       | 11.6       | 15.3       | 14.9       | 4.21       | 8.37       | 31.8       | 7.24       | 19.1       | 24.9       | 23.5       | 14.7       | 17.1       | 33.6       | 20.0       | 19.3       | 17.3       | 15.4       | 15.7       | 22.5       | 16.3       | 14.2       | 11.1       | 18.2       |
| Ge, ppm | 0.957      | 1.03       | 0.886      | 3.25       | 0.873      | 1.29       | 1.03       | 0.295      | 0.700      | 1.56       | 0.702      | 1.73       | 1.49       | 1.90       | 1.12       | 0.907      | 1.90       | 1.15       | 1.28       | 0.895      | 0.923      | 0.866      | 1.70       | 1.16       | 0.779      | 0.874      | 1.01       |
| As, ppm | 64.1       | 39.7       | 60.8       | 210        | 79.2       | 141        | 10.3       | 33.6       | 20.1       | 135        | 56.2       | 99.1       | 144        | 151        | 12.2       | 20.2       | 26.5       | 18.6       | 24.5       | 17.9       | 13.1       | 25.9       | 27.7       | 13.9       | 13.2       | 12.5       | 31.7       |
| Rb, ppm | 7.38       | 5.41       | 47.5       | 4.50       | 43.5       | 54.1       | 13.5       | 25.8       | 1.6        | 21.9       | 24.9       | 47.1       | 32.5       | 37.7       | 7.60       | 6.88       | 5.42       | 26.3       | 22.7       | 14.0       | 18.2       | 13.8       | n.d.       | 8.70       | 6.33       | 7.88       | 7.40       |
| Sr, ppm | 56.1       | 97.7       | 569        | 190        | 373        | 786        | 39.4       | 729        | 45.3       | 282        | 467        | 666        | 536        | 632        | 80.1       | 112        | 76.7       | 104        | 150        | 110        | 74.5       | 107        | 191        | 91.6       | 72.1       | 53.8       | 116        |
| Y, ppm  | 2.46       | 3.38       | 4.75       | 8.11       | 10.5       | 8.27       | 3.08       | 1.68       | 0.62       | 13.6       | 1.37       | 17.4       | 14.6       | 17.4       | 5.11       | 5.92       | 3.91       | 8.09       | 10.6       | 8.17       | 6.54       | 6.17       | 26.4       | 6.36       | 4.11       | 2.49       | 6.52       |
| Zr, ppm | 49.7       | 57.1       | 24.7       | 133        | 36.4       | 49.2       | 66.6       | 4.96       | 38.3       | 180        | 7.33       | 76.6       | 109        | 77.8       | 70.6       | 91.7       | 159        | 115        | 102        | 84.5       | 75.3       | 76.0       | 123        | 93.0       | 71.9       | 53.2       | 112        |
| Nb, ppm | 5.85       | 6.77       | 4.98       | 22.4       | 5.45       | 9.19       | 6.87       | 2.36       | 5.08       | 22.7       | 3.25       | 12.0       | 16.5       | 14.8       | 9.20       | 13.8       | 25.1       | 18.2       | 15.3       | 11.6       | 9.77       | 10.6       | 17.1       | 12.7       | 9.56       | 5.78       | 17.5       |

|         |        |        |        |       |       |       |        |        |        |       |        |       |       |       |       |       |       |       |       |       |       |       |       |       |       |        |       |
|---------|--------|--------|--------|-------|-------|-------|--------|--------|--------|-------|--------|-------|-------|-------|-------|-------|-------|-------|-------|-------|-------|-------|-------|-------|-------|--------|-------|
| Mo, ppm | 0.661  | 0.774  | 0.942  | 4.12  | 0.987 | 3.82  | 0.561  | 0.516  | 0.889  | 4.96  | 0.622  | 1.45  | 1.66  | 3.15  | 0.471 | 0.964 | 1.33  | 1.01  | 0.976 | 0.698 | 0.575 | 0.628 | 1.34  | 0.520 | 0.461 | 0.418  | 0.948 |
| Cd, ppm | 0.687  | 0.691  | 1.44   | 0.982 | 0.795 | 1.05  | 0.696  | 0.252  | 0.513  | 0.995 | 0.494  | 0.437 | 0.877 | 0.976 | 0.466 | 0.425 | 0.601 | 0.376 | 0.354 | 0.392 | 0.448 | 0.492 | 0.444 | 0.397 | 0.430 | 0.405  | 0.544 |
| Sn, ppm | 1.99   | 3.53   | 4.35   | 26.8  | 5.81  | 10.6  | 2.10   | 1.79   | 2.67   | 21.8  | 2.94   | 9.40  | 8.69  | 15.4  | 2.52  | 3.83  | 5.81  | 4.05  | 4.35  | 3.55  | 2.85  | 2.96  | 5.43  | 3.34  | 2.87  | 2.15   | 5.37  |
| Sb, ppm | 1.07   | 1.21   | 1.16   | 4.25  | 1.11  | 1.99  | 1.60   | 0.535  | 0.879  | 5.14  | 1.10   | 2.18  | 2.60  | 3.72  | 0.976 | 1.24  | 2.54  | 1.73  | 1.45  | 1.17  | 1.05  | 1.19  | 1.80  | 1.24  | 0.956 | 0.699  | 1.77  |
| Cs, ppm | 0.506  | 0.334  | 3.47   | 0.355 | 3.02  | 3.25  | 0.973  | 1.72   | 0.040  | 1.31  | 0.438  | 2.09  | 1.64  | 1.66  | 0.223 | 0.148 | 0.147 | 1.57  | 1.16  | 0.682 | 1.08  | 0.782 | 4.83  | 0.331 | 0.216 | 0.386  | 0.251 |
| Ba, ppm | 218    | 269    | 490    | 562   | 659   | 772   | 156    | 296    | 135    | 697   | 307    | 696   | 818   | 733   | 263   | 323   | 309   | 304   | 410   | 365   | 228   | 321   | 470   | 285   | 257   | 175    | 333   |
| La, ppm | 2.86   | 5.41   | 13.0   | 7.31  | 16.0  | 21.3  | 3.63   | 3.25   | 1.45   | 26.3  | 2.21   | 26.0  | 31.8  | 29.1  | 9.65  | 7.95  | 4.53  | 9.25  | 14.5  | 13.1  | 9.46  | 9.47  | 41.0  | 13.5  | 9.71  | 4.13   | 11.9  |
| Ce, ppm | 9.75   | 21.8   | 25.7   | 17.3  | 31.1  | 40.8  | 7.95   | 5.26   | 5.45   | 73.8  | 3.97   | 50.1  | 64.1  | 53.9  | 29.7  | 24.3  | 15.6  | 24.7  | 39.8  | 40.1  | 24.5  | 29.4  | 96.7  | 39.2  | 30.6  | 12.7   | 37.4  |
| Pr, ppm | 0.880  | 1.84   | 3.01   | 2.49  | 3.75  | 5.11  | 0.954  | 0.705  | 0.695  | 7.12  | 0.545  | 6.09  | 7.71  | 6.84  | 3.65  | 3.49  | 2.10  | 3.11  | 5.25  | 4.98  | 3.05  | 3.22  | 11.0  | 4.53  | 3.47  | 1.53   | 4.41  |
| Nd, ppm | 3.74   | 7.62   | 11.8   | 11.0  | 14.7  | 20.1  | 3.77   | 2.96   | 3.08   | 28.8  | 2.23   | 23.8  | 30.3  | 27.1  | 15.4  | 15.5  | 9.48  | 13.1  | 22.7  | 21.3  | 12.7  | 13.5  | 43.5  | 18.7  | 14.2  | 6.41   | 18.5  |
| Sm, ppm | 0.844  | 1.66   | 2.22   | 2.70  | 2.71  | 3.80  | 0.830  | 0.503  | 0.678  | 5.96  | 0.440  | 4.61  | 5.64  | 5.34  | 3.29  | 3.76  | 2.36  | 2.94  | 5.03  | 4.57  | 2.72  | 2.86  | 8.82  | 3.93  | 2.90  | 1.39   | 4.04  |
| Eu, ppm | 0.203  | 0.383  | 0.481  | 0.673 | 0.640 | 0.872 | 0.195  | 0.134  | 0.153  | 1.38  | 0.135  | 1.05  | 1.30  | 1.21  | 0.739 | 0.846 | 0.545 | 0.677 | 1.17  | 1.01  | 0.616 | 0.640 | 1.84  | 0.853 | 0.631 | 0.327  | 0.878 |
| Gd, ppm | 0.842  | 1.57   | 2.06   | 2.66  | 2.72  | 3.61  | 0.786  | 0.503  | 0.547  | 5.65  | 0.449  | 4.60  | 5.30  | 5.16  | 2.84  | 3.22  | 2.04  | 2.70  | 4.50  | 4.03  | 2.44  | 2.60  | 8.19  | 3.49  | 2.56  | 1.18   | 3.46  |
| Tb, ppm | 0.124  | 0.203  | 0.274  | 0.410 | 0.361 | 0.471 | 0.133  | 0.0686 | 0.0792 | 0.812 | 0.0666 | 0.615 | 0.715 | 0.690 | 0.375 | 0.460 | 0.322 | 0.396 | 0.630 | 0.556 | 0.336 | 0.350 | 1.10  | 0.463 | 0.331 | 0.172  | 0.473 |
| Dy, ppm | 0.693  | 1.16   | 1.56   | 2.46  | 2.12  | 2.70  | 0.688  | 0.386  | 0.416  | 4.61  | 0.413  | 3.46  | 4.01  | 3.87  | 2.12  | 2.60  | 1.80  | 2.24  | 3.61  | 3.12  | 1.88  | 2.00  | 6.15  | 2.54  | 1.86  | 1.00   | 2.71  |
| Ho, ppm | 0.132  | 0.213  | 0.285  | 0.482 | 0.399 | 0.498 | 0.140  | 0.0757 | 0.0732 | 0.846 | 0.0839 | 0.668 | 0.747 | 0.742 | 0.379 | 0.464 | 0.335 | 0.477 | 0.638 | 0.538 | 0.343 | 0.355 | 1.11  | 0.441 | 0.310 | 0.184  | 0.481 |
| Er, ppm | 0.374  | 0.570  | 0.782  | 1.41  | 1.14  | 1.37  | 0.387  | 0.220  | 0.209  | 2.43  | 0.241  | 1.91  | 2.08  | 2.13  | 1.01  | 1.25  | 0.920 | 1.19  | 1.82  | 1.50  | 0.971 | 1.02  | 3.10  | 1.25  | 0.897 | 0.518  | 1.36  |
| Tm, ppm | 0.0513 | 0.0800 | 0.111  | 0.204 | 0.165 | 0.178 | 0.0578 | 0.0318 | 0.0263 | 0.338 | 0.0356 | 0.266 | 0.277 | 0.283 | 0.134 | 0.167 | 0.126 | 0.168 | 0.242 | 0.199 | 0.133 | 0.144 | 0.425 | 0.167 | 0.123 | 0.0628 | 0.172 |
| Yb, ppm | 0.316  | 0.516  | 0.644  | 1.30  | 1.02  | 1.10  | 0.374  | 0.187  | 0.173  | 2.12  | 0.208  | 1.75  | 1.82  | 1.79  | 0.870 | 1.03  | 0.809 | 1.06  | 1.52  | 1.26  | 0.859 | 0.903 | 2.69  | 1.02  | 0.762 | 0.448  | 1.15  |
| Lu, ppm | 0.0471 | 0.0653 | 0.0879 | 0.188 | 0.154 | 0.156 | 0.0581 | 0.0276 | 0.0206 | 0.302 | 0.0345 | 0.251 | 0.268 | 0.263 | 0.118 | 0.144 | 0.109 | 0.151 | 0.211 | 0.174 | 0.114 | 0.134 | 0.389 | 0.138 | 0.100 | 0.0592 | 0.153 |
| Hf, ppm | 1.82   | 2.18   | 0.826  | 5.12  | 1.28  | 1.72  | 2.43   | 0.184  | 1.39   | 6.73  | 0.321  | 2.76  | 4.03  | 2.72  | 2.74  | 3.46  | 5.97  | 4.26  | 3.87  | 3.14  | 2.75  | 2.83  | 4.65  | 3.46  | 2.74  | 1.93   | 4.23  |
| Ta, ppm | 0.376  | 0.483  | 0.348  | 1.59  | 0.382 | 0.608 | 0.473  | 0.153  | 0.312  | 1.64  | 0.272  | 0.919 | 1.27  | 1.12  | 0.665 | 1.10  | 1.71  | 1.28  | 1.21  | 0.857 | 0.692 | 0.760 | 1.27  | 0.871 | 0.677 | 0.377  | 1.27  |
| W, ppm  | 1.45   | 1.72   | 4.28   | 7.55  | 1.60  | 2.58  | 0.958  | 0.633  | 0.902  | 6.25  | 1.07   | 3.71  | 5.48  | 5.37  | 2.22  | 3.12  | 3.09  | 2.46  | 3.21  | 2.84  | 1.46  | 1.78  | 3.38  | 1.84  | 1.50  | 0.811  | 2.68  |
| Tl, ppm | 0.322  | 0.355  | 0.253  | 0.633 | 0.318 | 0.392 | 0.253  | 0.114  | 0.224  | 0.726 | 0.261  | 0.504 | 0.681 | 0.644 | 0.441 | 0.491 | 0.789 | 0.531 | 0.535 | 0.511 | 0.477 | 0.490 | 0.580 | 0.465 | 0.455 | 0.359  | 0.584 |
| Pb, ppm | 24.2   | 24.1   | 23.6   | 32.8  | 33.1  | 60.7  | n.d.   | 15.2   | 46.1   | 57.4  | 30.9   | 187   | 37.3  | 49.6  | 21.8  | 20.6  | 34.8  | 22.7  | 21.9  | 25.0  | 21.5  | 23.3  | 26.3  | 19.4  | 19.9  | 16.7   | 24.3  |
| Th, ppm | 1.21   | 1.81   | 3.22   | 3.39  | 3.62  | 2.50  | 1.23   | 0.509  | 0.355  | 6.81  | 0.225  | 5.12  | 7.25  | 6.20  | 3.95  | 4.88  | 2.57  | 3.69  | 7.00  | 6.47  | 3.73  | 3.36  | 13.9  | 4.33  | 2.83  | 1.21   | 3.78  |
| U, ppm  | 1.53   | 1.64   | 2.43   | 2.66  | 2.04  | 4.48  | 2.08   | 2.73   | 1.34   | 3.03  | 1.29   | 2.01  | 3.58  | 3.41  | 1.85  | 2.11  | 3.58  | 2.59  | 2.11  | 2.00  | 2.14  | 1.78  | 3.17  | 1.87  | 1.72  | 1.48   | 2.13  |

Elemental composition of tributaries. All concentrations are in ppm unless indicated.

|      | Rybnaya    | Rybnaya    | Rybnaya    | Andreva    | Andreva    | Andreva    | Andreva    | Andreva    |
|------|------------|------------|------------|------------|------------|------------|------------|------------|
| Date | 10.05.2018 | 05.07.2018 | 20.09.2018 | 10.05.2018 | 05.07.2018 | 20.09.2018 | 21.10.2018 | 17.05.2019 |
| Si,% | n.d.       | n.d.       | 5.26       | n.d.       | n.d.       | 13.7       | 16.9       | n.d.       |
| Al,% | n.d.       | n.d.       | 0.990      | n.d.       | n.d.       | 4.84       | 5.22       | n.d.       |
| P,%  | n.d.       | n.d.       | 1.14       | n.d.       | n.d.       | 0.590      | 0.520      | n.d.       |
| Li   | 4.27       | 0.722      | 12.2       | 8.91       | 1.03       | 39.9       | 23.5       | 16.9       |
| Be   | 0.333      | 0.126      | 0.924      | 0.632      | 0.175      | 2.70       | 1.29       | 0.944      |
| B    | 3.75       | n.d.       | 27.9       | 13.5       | 1.49       | 49.8       | 16.9       | 15.9       |
| Na   | 1030       | 390        | 2810       | 1450       | 350        | 8330       | 7220       | 4150       |
| Mg   | 2650       | 1620       | 6770       | 3730       | 1790       | 12200      | 7280       | 6280       |
| K    | 2410       | 600        | 3380       | 4060       | 561        | 12600      | 10780      | 6650       |
| Ca   | 15700      | 24500      | 67400      | 12500      | 23800      | 45100      | 17900      | 16300      |
| Ti   | 285        | 82.3       | 965        | 539        | 74.0       | 5247       | 1773       | 1781       |
| V    | 27.7       | 9.77       | 61.3       | 46.6       | 13.6       | 262        | 84.6       | 107        |
| Cr   | 16.8       | 4.06       | 45.3       | 35.0       | 4.53       | 208        | 64.1       | 65.8       |
| Mn   | 22900      | 49200      | 88100      | 19400      | 55400      | 30400      | 3650       | 8680       |
| Fe   | 149000     | 171000     | 681000     | 122000     | 159000     | 351000     | 111000     | 149000     |
| Co   | 43.9       | 79.3       | 70.0       | 36.9       | 126        | 30.3       | 14.7       | 21.4       |
| Ni   | 12.6       | 4.85       | 23.3       | 20.6       | 6.36       | 67.9       | 33.8       | 21.2       |
| Cu   | 8.73       | 2.41       | 15.6       | 14.4       | 2.14       | 30.6       | 19.4       | 10.8       |
| Zn   | 125        | 53.4       | 173        | 158        | 58.0       | 169        | 101        | 116        |
| Ga   | 4.99       | 4.24       | 11.6       | 6.67       | 4.24       | 29.9       | 11.5       | 8.56       |
| Ge   | 0.240      | 0.144      | 0.969      | 0.223      | 0.152      | 2.70       | 1.07       | 0.911      |
| As   | 152        | 348        | 834        | 53.4       | 102        | 167        | 46.0       | 83.1       |
| Rb   | 12.2       | 2.98       | 18.9       | 23.4       | 3.04       | 22.6       | 18.4       | 12.4       |
| Sr   | 102        | 198        | 591        | 100        | 199        | 365        | 179        | 133        |
| Y    | 3.46       | 1.43       | 13.0       | 6.22       | 2.36       | 23.9       | 7.06       | 8.34       |
| Zr   | 11.3       | 3.24       | 40.7       | 21.9       | 3.55       | 187        | 60.8       | 55.2       |
| Nb   | 1.54       | 0.443      | 4.71       | 2.88       | 0.369      | 25.5       | 9.00       | 9.41       |
| Mo   | 0.818      | 0.627      | 1.70       | 0.939      | 0.576      | 2.07       | 0.375      | 0.948      |

|           |        |        |       |        |        |       |       |       |
|-----------|--------|--------|-------|--------|--------|-------|-------|-------|
| <b>Cd</b> | 0.837  | 0.207  | 0.486 | 0.771  | 0.264  | 0.480 | 0.270 | 0.556 |
| <b>Sn</b> | 1.09   | 0.208  | 2.05  | 2.24   | 0.317  | 6.28  | 2.03  | 2.84  |
| <b>Sb</b> | 1.38   | 0.210  | 0.904 | 2.27   | 0.330  | 2.43  | 0.685 | 0.854 |
| <b>Cs</b> | 0.820  | 0.180  | 1.45  | 1.59   | 0.182  | 0.897 | 0.777 | 0.712 |
| <b>Ba</b> | 399    | 741    | 2484  | 493    | 936    | 1374  | 585   | 528   |
| <b>La</b> | 5.37   | 1.84   | 12.8  | 8.58   | 2.35   | 36.6  | 14.5  | 10.4  |
| <b>Ce</b> | 13.0   | 4.14   | 28.0  | 22.9   | 6.70   | 88.4  | 35.0  | 25.7  |
| <b>Pr</b> | 1.16   | 0.406  | 3.21  | 2.04   | 0.588  | 10.6  | 4.39  | 3.31  |
| <b>Nd</b> | 4.59   | 1.63   | 13.1  | 7.95   | 2.33   | 42.2  | 17.3  | 13.6  |
| <b>Sm</b> | 0.945  | 0.329  | 2.83  | 1.60   | 0.510  | 8.75  | 3.56  | 3.03  |
| <b>Eu</b> | 0.223  | 0.132  | 0.865 | 0.381  | 0.191  | 2.09  | 0.834 | 0.741 |
| <b>Gd</b> | 0.936  | 0.355  | 2.89  | 1.59   | 0.545  | 8.42  | 3.16  | 2.89  |
| <b>Tb</b> | 0.126  | 0.0474 | 0.414 | 0.217  | 0.0740 | 1.18  | 0.417 | 0.409 |
| <b>Dy</b> | 0.690  | 0.255  | 2.45  | 1.26   | 0.441  | 6.82  | 2.37  | 2.39  |
| <b>Ho</b> | 0.135  | 0.0529 | 0.472 | 0.229  | 0.0794 | 1.24  | 0.419 | 0.441 |
| <b>Er</b> | 0.370  | 0.140  | 1.36  | 0.704  | 0.239  | 3.62  | 1.18  | 1.26  |
| <b>Tm</b> | 0.0509 | 0.0225 | 0.207 | 0.0984 | 0.0304 | 0.523 | 0.155 | 0.173 |
| <b>Yb</b> | 0.343  | 0.127  | 1.30  | 0.658  | 0.207  | 3.40  | 1.01  | 1.15  |
| <b>Lu</b> | 0.0485 | 0.0196 | 0.190 | 0.0949 | 0.0280 | 0.484 | 0.138 | 0.166 |
| <b>Hf</b> | 0.417  | 0.113  | 1.53  | 0.836  | 0.231  | 7.20  | 2.38  | 2.24  |
| <b>Ta</b> | 0.0950 | 0.0324 | 0.330 | 0.202  | 0.0225 | 1.83  | 0.852 | 0.678 |
| <b>W</b>  | 0.646  | 0.200  | 2.58  | 0.975  | 0.204  | 3.92  | 1.42  | 1.89  |
| <b>Tl</b> | 0.141  | 0.0939 | 0.122 | 0.161  | 0.0535 | 0.569 | 0.304 | 0.196 |
| <b>Pb</b> | 16.7   | 3.54   | 13.3  | 26.2   | 5.51   | 24.6  | 15.0  | 16.8  |
| <b>Th</b> | 1.41   | 0.343  | 4.13  | 2.55   | 0.454  | 12.6  | 4.69  | 4.84  |
| <b>U</b>  | 0.390  | 0.108  | 0.784 | 0.572  | 0.128  | 2.76  | 1.27  | 0.921 |

**Table S3.** Mann-Whitney (U-test) for the difference in mineralogical and chemical composition of the RSM from the Ob River main stem (n = 28) and two small tributaries (n = 10).

| Ob River<br>vs. tributaries    | U   | Z     | p-value |
|--------------------------------|-----|-------|---------|
| <b>RSM<br/>Concentration</b>   | 99  | -1.34 | 0.18    |
| <b>Si,%</b>                    | 21  | 2.02  | 0.04    |
| <b>Al,%</b>                    | 12  | 2.60  | 0.01    |
| <b>P,%</b>                     | 5   | -3.06 | 0.002   |
| <b>Quartz</b>                  | 30  | -1.32 | 0.19    |
| <b>Albite</b>                  | 29  | -1.43 | 0.15    |
| <b>Potassium<br/>feldspars</b> | 12  | -2.58 | 0.01    |
| <b>Amphibole</b>               | 5   | -2.55 | 0.01    |
| <b>Pyroxene</b>                | 14  | -1.06 | 0.29    |
| <b>Smectite</b>                | 5   | -2.21 | 0.03    |
| <b>Illite</b>                  | 34  | -1.05 | 0.29    |
| <b>Kaolinite</b>               | 4   | -3.09 | 0.002   |
| <b>Chlorite</b>                | 31  | -0.70 | 0.49    |
| <b>Li</b>                      | 48  | 2.34  | 0.02    |
| <b>Be</b>                      | 35  | 2.85  | 0.004   |
| <b>B</b>                       | 39  | 2.34  | 0.02    |
| <b>Na</b>                      | 72  | 1.39  | 0.16    |
| <b>Mg</b>                      | 88  | 0.77  | 0.44    |
| <b>Al</b>                      | 80  | 1.08  | 0.28    |
| <b>P</b>                       | 26  | -3.20 | 0.001   |
| <b>K</b>                       | 19  | 3.48  | 0.001   |
| <b>Ca</b>                      | 92  | -0.61 | 0.54    |
| <b>Ti</b>                      | 52  | 2.18  | 0.03    |
| <b>V</b>                       | 37  | 2.77  | 0.01    |
| <b>Cr</b>                      | 41  | 2.61  | 0.01    |
| <b>Mn</b>                      | 17  | -3.56 | 0.000   |
| <b>Fe</b>                      | 9   | -3.87 | 0.000   |
| <b>Co</b>                      | 28  | -3.12 | 0.002   |
| <b>Ni</b>                      | 28  | 3.12  | 0.002   |
| <b>Cu</b>                      | 3   | 4.11  | 0.000   |
| <b>Zn</b>                      | 95  | 0.49  | 0.62    |
| <b>Ga</b>                      | 44  | 2.49  | 0.01    |
| <b>Ge</b>                      | 63  | 1.75  | 0.08    |
| <b>As</b>                      | 33  | -2.93 | 0.003   |
| <b>Rb</b>                      | 87  | 0.67  | 0.50    |
| <b>Sr</b>                      | 87  | -0.81 | 0.42    |
| <b>Y</b>                       | 107 | -0.02 | 0.98    |

|           |     |       |       |
|-----------|-----|-------|-------|
| <b>Zr</b> | 53  | 2.14  | 0.03  |
| <b>Nb</b> | 50  | 2.26  | 0.02  |
| <b>Mo</b> | 101 | 0.26  | 0.80  |
| <b>Cd</b> | 83  | 0.96  | 0.34  |
| <b>Sn</b> | 35  | 2.85  | 0.004 |
| <b>Sb</b> | 65  | 1.67  | 0.10  |
| <b>Cs</b> | 97  | 0.41  | 0.68  |
| <b>Ba</b> | 32  | -2.97 | 0.003 |
| <b>La</b> | 97  | 0.41  | 0.68  |
| <b>Ce</b> | 88  | 0.77  | 0.44  |
| <b>Pr</b> | 81  | 1.04  | 0.30  |
| <b>Nd</b> | 81  | 1.04  | 0.30  |
| <b>Sm</b> | 82  | 1.00  | 0.32  |
| <b>Eu</b> | 91  | 0.65  | 0.52  |
| <b>Gd</b> | 89  | 0.73  | 0.47  |
| <b>Tb</b> | 87  | 0.81  | 0.42  |
| <b>Dy</b> | 86  | 0.84  | 0.40  |
| <b>Ho</b> | 85  | 0.88  | 0.38  |
| <b>Er</b> | 88  | 0.77  | 0.44  |
| <b>Tm</b> | 90  | 0.69  | 0.49  |
| <b>Yb</b> | 93  | 0.57  | 0.57  |
| <b>Lu</b> | 94  | 0.53  | 0.60  |
| <b>Hf</b> | 56  | 2.02  | 0.04  |
| <b>Ta</b> | 57  | 1.98  | 0.05  |
| <b>W</b>  | 59  | 1.91  | 0.06  |
| <b>Tl</b> | 29  | 3.08  | 0.002 |
| <b>Pb</b> | 32  | 2.90  | 0.004 |
| <b>Th</b> | 99  | 0.33  | 0.74  |
| <b>U</b>  | 21  | 3.40  | 0.001 |

**Table S4.** Pairwise Pearson linear correlation between element concentration in the RSM of the Ob River and percentage of constituting minerals. Red numbers denote significant ( $p < 0.05$ ) correlations.

|          | Dis-charge   | Water level  | Quartz       | Albite       | K feldspar   | Illite       | Kaolinite    | Chlorite     | Amphibol     | Pyroxene | Muscovite   | Calcite      | Smectite     |
|----------|--------------|--------------|--------------|--------------|--------------|--------------|--------------|--------------|--------------|----------|-------------|--------------|--------------|
| <i>n</i> | <i>n</i> =27 | <i>n</i> =25 | <i>n</i> =19 | <i>n</i> =14 |          | <i>n</i> =6 | <i>n</i> =12 | <i>n</i> =15 |
| Si,%     | 0.56         | 0.46         | 0.78         | 0.84         | 0.45         | 0.18         | 0.11         | 0.24         | 0.04         | -0.16    | 0.61        | -0.80        | 0.08         |
| Al,%     | 0.71         | 0.56         | 0.72         | 0.81         | 0.59         | 0.34         | 0.33         | 0.39         | 0.33         | 0.28     | 0.41        | -0.96        | 0.34         |
| P,%      | -0.83        | -0.65        | -0.70        | -0.45        | -0.12        | 0.09         | 0.08         | -0.22        | -0.26        | 0.13     | 0.20        | 0.60         | -0.55        |
| TSS      | 0.73         |              | 0.58         | 0.31         | 0.10         | -0.25        | 0.29         | 0.47         | -0.20        | -0.03    | -0.53       | -0.52        | 0.28         |
| Li       | 0.20         | 0.38         | 0.02         | 0.12         | 0.00         | -0.23        | 0.00         | 0.60         | -0.55        | -0.26    | 0.03        | -0.29        | 0.33         |
| Be       | 0.31         | 0.47         | 0.31         | 0.40         | 0.18         | -0.13        | 0.05         | 0.75         | -0.36        | -0.11    | 0.07        | -0.56        | 0.00         |
| B        | 0.13         | 0.28         | 0.39         | 0.47         | 0.30         | 0.09         | 0.21         | 0.59         | -0.07        | 0.07     | -0.12       | -0.62        | -0.14        |
| Na       | 0.47         | 0.52         | 0.13         | -0.07        | -0.24        | -0.51        | -0.17        | 0.41         | -0.59        | -0.47    | -0.02       | -0.20        | 0.64         |
| Mg       | 0.03         | 0.16         | -0.29        | -0.30        | -0.26        | -0.35        | -0.18        | 0.32         | -0.57        | -0.33    | 0.11        | 0.08         | 0.42         |
| K        | 0.59         | 0.63         | 0.57         | 0.51         | 0.22         | -0.17        | 0.02         | 0.54         | -0.34        | -0.42    | 0.17        | -0.68        | 0.47         |
| Ca       | -0.61        | -0.43        | -0.90        | -0.86        | -0.67        | -0.46        | -0.28        | -0.22        | -0.46        | -0.19    | 0.58        | 0.89         | -0.18        |
| Ti       | 0.30         | 0.44         | 0.26         | 0.30         | 0.05         | -0.27        | 0.00         | 0.70         | -0.45        | -0.23    | 0.00        | -0.43        | 0.06         |
| V        | -0.14        | 0.02         | -0.12        | 0.10         | 0.02         | -0.14        | -0.04        | 0.62         | -0.55        | -0.11    | 0.16        | -0.10        | -0.22        |
| Cr       | -0.09        | 0.12         | -0.10        | 0.07         | -0.05        | -0.22        | -0.07        | 0.61         | -0.61        | -0.20    | 0.21        | -0.09        | -0.07        |
| Mn       | -0.67        | -0.54        | -0.51        | -0.19        | 0.14         | 0.37         | -0.09        | 0.09         | -0.40        | 0.17     | 0.72        | 0.15         | -0.44        |
| Fe       | -0.38        | -0.20        | -0.43        | -0.17        | -0.10        | -0.15        | -0.08        | 0.42         | -0.58        | -0.08    | 0.15        | 0.19         | -0.26        |
| Co       | 0.02         | 0.16         | 0.08         | 0.30         | 0.26         | 0.03         | 0.09         | 0.71         | -0.35        | 0.09     | 0.05        | -0.35        | -0.24        |
| Ni       | 0.05         | 0.25         | 0.07         | 0.30         | 0.21         | -0.03        | 0.06         | 0.69         | -0.32        | 0.04     | -0.19       | -0.32        | -0.28        |
| Cu       | -0.42        | -0.32        | -0.32        | 0.02         | 0.19         | 0.10         | 0.12         | 0.48         | -0.20        | 0.22     | 0.55        | 0.03         | -0.47        |
| Zn       | -0.57        | -0.46        | -0.72        | -0.40        | -0.21        | -0.08        | 0.05         | 0.08         | -0.21        | 0.18     | 0.40        | 0.49         | -0.35        |
| Ga       | 0.21         | 0.37         | 0.15         | 0.27         | 0.10         | -0.15        | 0.05         | 0.72         | -0.44        | -0.13    | 0.21        | -0.35        | -0.03        |
| Ge       | -0.09        | 0.01         | -0.08        | 0.05         | 0.02         | -0.12        | -0.07        | 0.76         | -0.60        | -0.22    | 0.26        | -0.18        | -0.02        |
| As       | -0.61        | -0.44        | -0.65        | -0.37        | -0.16        | -0.04        | -0.14        | 0.15         | -0.52        | 0.00     | 0.43        | 0.37         | -0.36        |
| Rb       | -0.19        | -0.11        | -0.38        | -0.45        | -0.42        | -0.43        | -0.19        | 0.20         | -0.34        | -0.29    | 0.53        | 0.57         | 0.47         |
| Sr       | -0.59        | -0.40        | -0.89        | -0.84        | -0.66        | -0.48        | -0.28        | -0.16        | -0.51        | -0.20    | 0.42        | 0.86         | -0.13        |
| Y        | 0.00         | 0.05         | -0.23        | -0.22        | -0.22        | -0.31        | -0.16        | 0.35         | -0.46        | -0.38    | 0.52        | 0.06         | 0.44         |
| Zr       | 0.33         | 0.47         | 0.41         | 0.45         | 0.17         | -0.14        | 0.10         | 0.70         | -0.29        | -0.21    | 0.16        | -0.63        | 0.17         |
| Nb       | 0.27         | 0.41         | 0.24         | 0.27         | 0.04         | -0.25        | 0.01         | 0.67         | -0.43        | -0.22    | 0.06        | -0.42        | 0.07         |



|           |       |       |       |       |       |       |       |      |       |       |      |       |       |
|-----------|-------|-------|-------|-------|-------|-------|-------|------|-------|-------|------|-------|-------|
| <b>Mo</b> | -0.36 | -0.22 | -0.41 | -0.23 | -0.08 | -0.13 | -0.11 | 0.42 | -0.63 | -0.06 | 0.33 | 0.20  | -0.19 |
| <b>Cd</b> | -0.54 | -0.43 | -0.30 | 0.15  | 0.30  | 0.43  | 0.23  | 0.23 | -0.09 | 0.41  | 0.44 | -0.03 | -0.61 |
| <b>Sn</b> | -0.37 | -0.23 | -0.44 | -0.25 | -0.08 | -0.15 | -0.18 | 0.38 | -0.62 | -0.16 | 0.39 | 0.18  | -0.21 |
| <b>Sb</b> | -0.26 | -0.10 | -0.33 | -0.07 | 0.03  | -0.08 | -0.01 | 0.55 | -0.50 | 0.02  | 0.14 | 0.07  | -0.29 |
| <b>Cs</b> | -0.19 | -0.14 | -0.36 | -0.44 | -0.44 | -0.42 | -0.16 | 0.13 | -0.24 | -0.22 | 0.52 | 0.72  | 0.51  |
| <b>Ba</b> | -0.43 | -0.25 | -0.54 | -0.38 | -0.31 | -0.34 | -0.17 | 0.24 | -0.58 | -0.25 | 0.38 | 0.31  | -0.01 |
| <b>La</b> | -0.12 | -0.07 | -0.31 | -0.20 | -0.24 | -0.28 | -0.16 | 0.24 | -0.46 | -0.38 | 0.58 | 0.10  | 0.33  |
| <b>Ce</b> | 0.03  | 0.07  | -0.12 | -0.04 | -0.17 | -0.25 | -0.13 | 0.23 | -0.39 | -0.46 | 0.58 | -0.18 | 0.47  |
| <b>Pr</b> | 0.08  | 0.11  | -0.12 | -0.06 | -0.19 | -0.28 | -0.14 | 0.26 | -0.45 | -0.46 | 0.55 | -0.15 | 0.47  |
| <b>Nd</b> | 0.12  | 0.15  | -0.08 | -0.03 | -0.18 | -0.28 | -0.14 | 0.27 | -0.46 | -0.48 | 0.53 | -0.20 | 0.50  |
| <b>Sm</b> | 0.20  | 0.24  | 0.01  | 0.02  | -0.15 | -0.28 | -0.11 | 0.31 | -0.47 | -0.49 | 0.50 | -0.30 | 0.55  |
| <b>Eu</b> | 0.19  | 0.24  | -0.01 | 0.01  | -0.16 | -0.29 | -0.13 | 0.32 | -0.50 | -0.49 | 0.47 | -0.27 | 0.54  |
| <b>Gd</b> | 0.15  | 0.19  | -0.05 | -0.03 | -0.17 | -0.29 | -0.13 | 0.31 | -0.48 | -0.48 | 0.51 | -0.23 | 0.53  |
| <b>Tb</b> | 0.16  | 0.23  | -0.03 | -0.02 | -0.16 | -0.30 | -0.11 | 0.35 | -0.50 | -0.47 | 0.48 | -0.24 | 0.54  |
| <b>Dy</b> | 0.16  | 0.22  | -0.02 | -0.02 | -0.16 | -0.30 | -0.12 | 0.35 | -0.50 | -0.47 | 0.48 | -0.25 | 0.54  |
| <b>Yb</b> | 0.09  | 0.17  | -0.09 | -0.08 | -0.18 | -0.32 | -0.14 | 0.38 | -0.50 | -0.45 | 0.49 | -0.15 | 0.49  |
| <b>Hf</b> | 0.34  | 0.48  | 0.43  | 0.46  | 0.16  | -0.15 | 0.11  | 0.68 | -0.26 | -0.21 | 0.19 | -0.65 | 0.19  |
| <b>W</b>  | -0.19 | -0.01 | -0.24 | -0.10 | -0.11 | -0.22 | -0.05 | 0.43 | -0.67 | -0.21 | 0.08 | 0.00  | 0.02  |
| <b>Tl</b> | 0.25  | 0.37  | 0.24  | 0.35  | 0.16  | -0.10 | -0.07 | 0.59 | -0.52 | -0.30 | 0.30 | -0.47 | 0.02  |
| <b>Pb</b> | -0.04 | -0.15 | -0.16 | -0.03 | 0.20  | 0.20  | 0.48  | 0.12 | 0.47  | 0.53  | 0.17 | 0.18  | -0.15 |
| <b>Th</b> | 0.29  | 0.31  | 0.04  | 0.00  | -0.19 | -0.28 | -0.08 | 0.28 | -0.39 | -0.43 | 0.47 | -0.30 | 0.66  |
| <b>U</b>  | -0.11 | 0.03  | -0.40 | -0.29 | -0.43 | -0.43 | -0.06 | 0.28 | -0.48 | -0.03 | 0.34 | 0.58  | -0.07 |

**Table S5.** Pairwise Pearson linear correlation between element concentration in the RSM of the Ob River and small tributaries. Red numbers denote significant ( $p < 0.05$ ) correlations.

|    | Si   | Al   | P    | K    | Ca   | Fe   |
|----|------|------|------|------|------|------|
| Si | 1.0  | 0.3  | -0.5 | 0.8  | -0.9 | -0.2 |
| Li | 0.2  | 0.9  | 0.4  | 0.8  | 0.0  | 0.7  |
| Be | 0.6  | 0.7  | 0.2  | 0.8  | -0.3 | 0.5  |
| B  | 0.7  | 0.5  | 0.1  | 0.8  | -0.4 | 0.4  |
| Na | 0.2  | 0.8  | 0.2  | 0.7  | 0.0  | 0.4  |
| Mg | -0.2 | 0.8  | 0.6  | 0.4  | 0.4  | 0.7  |
| Al | 0.3  | 1.0  | 0.2  | 0.8  | -0.1 | 0.5  |
| P  | -0.5 | 0.2  | 1.0  | 0.0  | 0.7  | 0.9  |
| K  | 0.8  | 0.8  | 0.0  | 1.0  | -0.5 | 0.3  |
| Ca | -0.9 | -0.1 | 0.7  | -0.5 | 1.0  | 0.5  |
| Ti | 0.6  | 0.7  | 0.2  | 0.9  | -0.2 | 0.5  |
| V  | 0.2  | 0.6  | 0.6  | 0.6  | 0.1  | 0.9  |
| Cr | 0.2  | 0.7  | 0.6  | 0.7  | 0.1  | 0.9  |
| Mn | -0.5 | -0.1 | 0.7  | -0.4 | 0.5  | 0.6  |
| Fe | -0.2 | 0.5  | 0.9  | 0.3  | 0.5  | 1.0  |
| Co | 0.3  | 0.6  | 0.4  | 0.6  | -0.1 | 0.8  |
| Ni | 0.4  | 0.6  | 0.4  | 0.7  | -0.1 | 0.7  |
| Cu | -0.2 | 0.2  | 0.8  | 0.1  | 0.3  | 0.8  |
| Zn | -0.5 | 0.1  | 0.8  | -0.1 | 0.6  | 0.8  |
| Ga | 0.5  | 0.7  | 0.3  | 0.8  | -0.2 | 0.7  |
| Ge | 0.2  | 0.7  | 0.5  | 0.5  | 0.1  | 0.8  |
| As | -0.5 | 0.2  | 1.0  | -0.1 | 0.7  | 0.9  |
| Rb | -0.4 | 0.5  | 0.4  | 0.0  | 0.5  | 0.4  |
| Sr | -0.8 | 0.0  | 0.7  | -0.4 | 1.0  | 0.6  |
| Y  | -0.1 | 0.8  | 0.5  | 0.4  | 0.3  | 0.6  |
| Zr | 0.7  | 0.7  | 0.0  | 0.9  | -0.4 | 0.4  |
| Nb | 0.6  | 0.7  | 0.2  | 0.8  | -0.2 | 0.5  |
| Mo | -0.3 | 0.5  | 0.8  | 0.2  | 0.5  | 0.9  |
| Cd | -0.4 | -0.2 | 0.6  | -0.3 | 0.3  | 0.5  |
| Sn | -0.3 | 0.5  | 0.9  | 0.2  | 0.5  | 0.9  |
| Sb | -0.1 | 0.5  | 0.8  | 0.4  | 0.3  | 0.9  |
| Cs | -0.5 | 0.3  | 0.3  | -0.1 | 0.5  | 0.3  |
| Ba | -0.4 | 0.5  | 0.9  | 0.2  | 0.7  | 0.9  |
| La | -0.2 | 0.8  | 0.7  | 0.4  | 0.4  | 0.7  |
| Ce | 0.1  | 0.8  | 0.5  | 0.5  | 0.2  | 0.5  |
| Pr | 0.1  | 0.9  | 0.5  | 0.6  | 0.2  | 0.6  |
| Nd | 0.1  | 0.9  | 0.5  | 0.6  | 0.2  | 0.6  |
| Sm | 0.2  | 0.9  | 0.4  | 0.7  | 0.1  | 0.5  |
| Eu | 0.2  | 0.9  | 0.4  | 0.7  | 0.1  | 0.6  |
| Gd | 0.1  | 0.9  | 0.4  | 0.6  | 0.1  | 0.6  |
| Tb | 0.1  | 0.9  | 0.4  | 0.7  | 0.1  | 0.6  |
| Dy | 0.1  | 0.9  | 0.4  | 0.7  | 0.1  | 0.6  |
| Ho | 0.1  | 0.9  | 0.5  | 0.7  | 0.1  | 0.6  |

|           |      |      |      |      |      |      |
|-----------|------|------|------|------|------|------|
| <b>Er</b> | 0.1  | 0.9  | 0.5  | 0.6  | 0.2  | 0.6  |
| <b>Tm</b> | 0.1  | 0.9  | 0.5  | 0.6  | 0.2  | 0.6  |
| <b>Yb</b> | 0.1  | 0.9  | 0.5  | 0.6  | 0.2  | 0.6  |
| <b>Lu</b> | 0.1  | 0.9  | 0.5  | 0.6  | 0.2  | 0.6  |
| <b>Hf</b> | 0.7  | 0.7  | 0.0  | 0.9  | -0.5 | 0.4  |
| <b>Ta</b> | 0.5  | 0.8  | 0.2  | 0.9  | -0.2 | 0.6  |
| <b>W</b>  | -0.2 | 0.6  | 0.8  | 0.4  | 0.4  | 0.9  |
| <b>Tl</b> | 0.6  | 0.8  | 0.4  | 0.9  | -0.2 | 0.7  |
| <b>Pb</b> | -0.2 | -0.2 | -0.1 | -0.3 | -0.1 | -0.1 |
| <b>Th</b> | 0.1  | 0.9  | 0.3  | 0.6  | 0.0  | 0.4  |
| <b>U</b>  | -0.2 | 0.4  | 0.6  | 0.3  | 0.4  | 0.7  |

**Table S6.** Mann-Whitney (U-test) for the difference in mineralogical and chemical composition of the RSM from the Ob River main stem by seasons. Significant ( $p < 0.05$ ) differences are shown by red color. TSS is total suspended solid

|                     | U                                         | Z      | p-value | U                                        | Z      | p-value | U                                            | Z       | p-value |
|---------------------|-------------------------------------------|--------|---------|------------------------------------------|--------|---------|----------------------------------------------|---------|---------|
|                     | <i>Ice cover season/<br/>Flood season</i> |        |         | <i>Flood season/<br/>Baseflow season</i> |        |         | <i>Ice cover season/<br/>Baseflow season</i> |         |         |
| TSS                 | 1                                         | -4.01  | 0.00006 | 6                                        | 1.91   | 0.0562  | 1                                            | -2.81   | 0.00489 |
| Si                  | 3                                         | -3.07  | 0.00211 | 10                                       | -1.34  | 0.179   | 0                                            | -2.55   | 0.0107  |
| A                   | 11                                        | -2.29  | 0.0218  | 8                                        | 1.63   | 0.104   | 8                                            | -1.04   | 0.299   |
| P                   | 2                                         | 3.17   | 0.00152 | 13                                       | -0.990 | 0.322   | 3                                            | 1.98    | 0.0472  |
| Quartz              | 0                                         | -3.20  | 0.00138 | 12                                       | 1.13   | 0.258   | 0                                            | -2.45   | 0.0142  |
| Albite              | 14                                        | -1.68  | 0.093   | 9                                        | -1.48  | 0.138   | 2                                            | -2.03   | 0.0428  |
| Potassium feldspars | 27                                        | -0.325 | 0.745   | 12                                       | -1.06  | 0.289   | 8                                            | -0.853  | 0.394   |
| Pyroxene            | 11                                        | 0.974  | 0.330   | 13                                       | 0.189  | 0.850   | 6                                            | 0.857   | 0.391   |
| Calcite             | 1                                         | 2.30   | 0.0216  | 4                                        | -1.04  | 0.297   | 1                                            | 1.79    | 0.0736  |
| Smectite            | 4                                         | -2.01  | 0.0446  | 3                                        | 1.81   | 0.0700  | 9                                            | -0.245  | 0.806   |
| Illite              | 28                                        | 0.217  | 0.828   | 14                                       | -0.778 | 0.437   | 11                                           | -0.213  | 0.831   |
| Kaolinite           | 27                                        | -0.059 | 0.953   | 16                                       | 0.231  | 0.817   | 11                                           | 0.107   | 0.915   |
| Chlorite            | 26                                        | -0.434 | 0.664   | 15                                       | 0.707  | 0.480   | 10                                           | 0.320   | 0.749   |
| Li                  | 41                                        | -1.35  | 0.176   | 4                                        | 2.08   | 0.0372  | 24                                           | 0.372   | 0.710   |
| Be                  | 34                                        | -1.80  | 0.073   | 10                                       | 1.16   | 0.247   | 24                                           | -0.372  | 0.710   |
| B                   | 38                                        | -1.54  | 0.123   | 12                                       | 0.849  | 0.396   | 26                                           | -0.159  | 0.873   |
| Na                  | 24                                        | -2.43  | 0.0153  | 8                                        | 1.47   | 0.143   | 20                                           | -0.796  | 0.426   |
| Mg                  | 53                                        | -0.598 | 0.550   | 0                                        | 2.70   | 0.00693 | 16                                           | 1.22    | 0.222   |
| K                   | 12                                        | -3.18  | 0.00147 | 9                                        | 1.31   | 0.190   | 9                                            | -1.96   | 0.0495  |
| Ca                  | 28                                        | 2.17   | 0.0298  | 18                                       | -0.077 | 0.939   | 12                                           | 1.65    | 0.100   |
| Ti                  | 32                                        | -1.92  | 0.055   | 12                                       | 0.849  | 0.396   | 18                                           | -1.01   | 0.313   |
| V                   | 54                                        | -0.535 | 0.592   | 14                                       | 0.540  | 0.589   | 26                                           | 0.159   | 0.873   |
| Cr                  | 47                                        | -0.976 | 0.329   | 10                                       | 1.16   | 0.247   | 27                                           | 0.0531  | 0.958   |
| Mn                  | 5                                         | 3.62   | 0.00029 | 12                                       | -0.849 | 0.396   | 3                                            | 2.60    | 0.00927 |
| Fe                  | 49                                        | 0.850  | 0.395   | 8                                        | 1.47   | 0.143   | 12                                           | 1.65    | 0.100   |
| Co                  | 61                                        | 0.094  | 0.925   | 4                                        | 2.08   | 0.0372  | 17                                           | 1.12    | 0.265   |
| Ni                  | 52                                        | -0.661 | 0.508   | 13                                       | 0.694  | 0.487   | 27                                           | 0.0531  | 0.958   |
| Cu                  | 35                                        | 1.73   | 0.083   | 18                                       | -0.077 | 0.939   | 13                                           | 1.54    | 0.124   |
| Zn                  | 0                                         | 3.94   | 0.00008 | 4                                        | 2.08   | 0.0372  | 0                                            | 2.92    | 0.00350 |
| Ga                  | 39                                        | -1.48  | 0.139   | 8                                        | 1.47   | 0.143   | 27                                           | -0.0531 | 0.958   |
| Ge                  | 60                                        | -0.157 | 0.875   | 11                                       | 1.00   | 0.316   | 21                                           | 0.690   | 0.490   |
| As                  | 14                                        | 3.06   | 0.00225 | 14                                       | 0.540  | 0.589   | 5                                            | 2.39    | 0.0169  |
| Rb                  | 39                                        | 1.13   | 0.260   | 9                                        | 1.10   | 0.270   | 15                                           | 1.33    | 0.184   |
| Sr                  | 34                                        | 1.80   | 0.0726  | 10                                       | 1.16   | 0.247   | 12                                           | 1.65    | 0.100   |
| Y                   | 53                                        | -0.598 | 0.550   | 9                                        | 1.31   | 0.190   | 24                                           | 0.372   | 0.710   |
| Zr                  | 29                                        | -2.11  | 0.0348  | 12                                       | 0.849  | 0.396   | 17                                           | -1.12   | 0.265   |
| Nb                  | 31                                        | -1.98  | 0.0472  | 12                                       | 0.849  | 0.396   | 20                                           | -0.796  | 0.426   |
| Mo                  | 47                                        | 0.976  | 0.329   | 5                                        | 1.93   | 0.0538  | 8                                            | 2.07    | 0.0384  |
| Cd                  | 16                                        | 2.93   | 0.00340 | 18                                       | -0.077 | 0.939   | 7                                            | 2.18    | 0.0295  |

|           |    |        |        |    |        |        |    |         |        |
|-----------|----|--------|--------|----|--------|--------|----|---------|--------|
| <b>Sn</b> | 51 | 0.724  | 0.469  | 12 | 0.849  | 0.396  | 19 | 0.903   | 0.367  |
| <b>Sb</b> | 56 | 0.409  | 0.682  | 12 | 0.849  | 0.396  | 18 | 1.01    | 0.313  |
| <b>Cs</b> | 46 | 1.04   | 0.299  | 11 | 1.00   | 0.316  | 6  | 2.28    | 0.0224 |
| <b>Ba</b> | 47 | 0.976  | 0.329  | 9  | 1.31   | 0.190  | 15 | 1.33    | 0.184  |
| <b>La</b> | 56 | -0.409 | 0.682  | 17 | -0.077 | 0.939  | 27 | 0.0531  | 0.958  |
| <b>Ce</b> | 52 | -0.661 | 0.508  | 18 | 0.077  | 0.939  | 25 | -0.265  | 0.791  |
| <b>Pr</b> | 47 | -0.976 | 0.329  | 16 | 0.231  | 0.817  | 25 | -0.265  | 0.791  |
| <b>Nd</b> | 44 | -1.17  | 0.244  | 16 | 0.231  | 0.817  | 25 | -0.265  | 0.791  |
| <b>Sm</b> | 39 | -1.48  | 0.139  | 15 | 0.386  | 0.700  | 22 | -0.584  | 0.559  |
| <b>Eu</b> | 43 | -1.23  | 0.219  | 14 | 0.540  | 0.589  | 25 | -0.265  | 0.791  |
| <b>Gd</b> | 46 | -1.04  | 0.299  | 14 | 0.540  | 0.589  | 26 | -0.159  | 0.873  |
| <b>Tb</b> | 45 | -1.10  | 0.270  | 13 | 0.694  | 0.487  | 25 | -0.265  | 0.791  |
| <b>Dy</b> | 46 | -1.04  | 0.299  | 12 | 0.849  | 0.396  | 25 | -0.265  | 0.791  |
| <b>Ho</b> | 48 | -0.913 | 0.361  | 10 | 1.16   | 0.247  | 28 | 0.0531  | 0.958  |
| <b>Er</b> | 48 | -0.913 | 0.361  | 11 | 1.00   | 0.316  | 28 | 0.0531  | 0.958  |
| <b>Tm</b> | 49 | -0.850 | 0.395  | 11 | 1.00   | 0.316  | 28 | 0.0531  | 0.958  |
| <b>Yb</b> | 49 | -0.850 | 0.395  | 10 | 1.16   | 0.247  | 27 | -0.0531 | 0.958  |
| <b>Lu</b> | 51 | -0.724 | 0.469  | 10 | 1.16   | 0.247  | 26 | 0.159   | 0.873  |
| <b>Hf</b> | 25 | -2.36  | 0.0182 | 12 | 0.849  | 0.396  | 16 | -1.22   | 0.222  |
| <b>W</b>  | 60 | -0.157 | 0.875  | 7  | 1.62   | 0.105  | 21 | 0.690   | 0.490  |
| <b>Tl</b> | 36 | -1.67  | 0.0951 | 10 | 1.16   | 0.247  | 20 | -0.796  | 0.426  |
| <b>Pb</b> | 21 | 2.47   | 0.0135 | 6  | 1.77   | 0.0760 | 7  | 2.09    | 0.0362 |
| <b>Th</b> | 32 | -1.92  | 0.0547 | 10 | 1.16   | 0.247  | 25 | -0.265  | 0.791  |
| <b>U</b>  | 62 | -0.031 | 0.975  | 7  | 1.62   | 0.105  | 17 | 1.12    | 0.265  |
